# Supplementary material for: Functional Roles for CD26/DPP4 in Mediating Inflammatory Responses of Pulmonary Vascular Endothelial Cells
Source: MDPI journal article supplement (doi:10.3390/cells10123508), 2021-12-11

Supplementary Figure S1

Representative image regarding quantification of tube formation assay

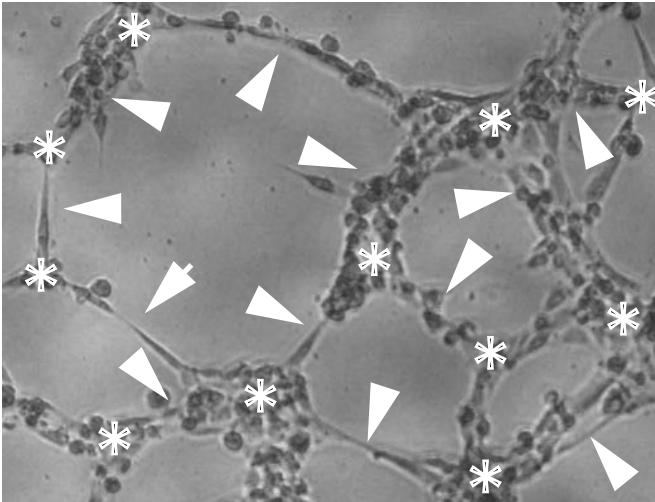

Supplementary Figure S2  
Representative images regarding wound healing assay

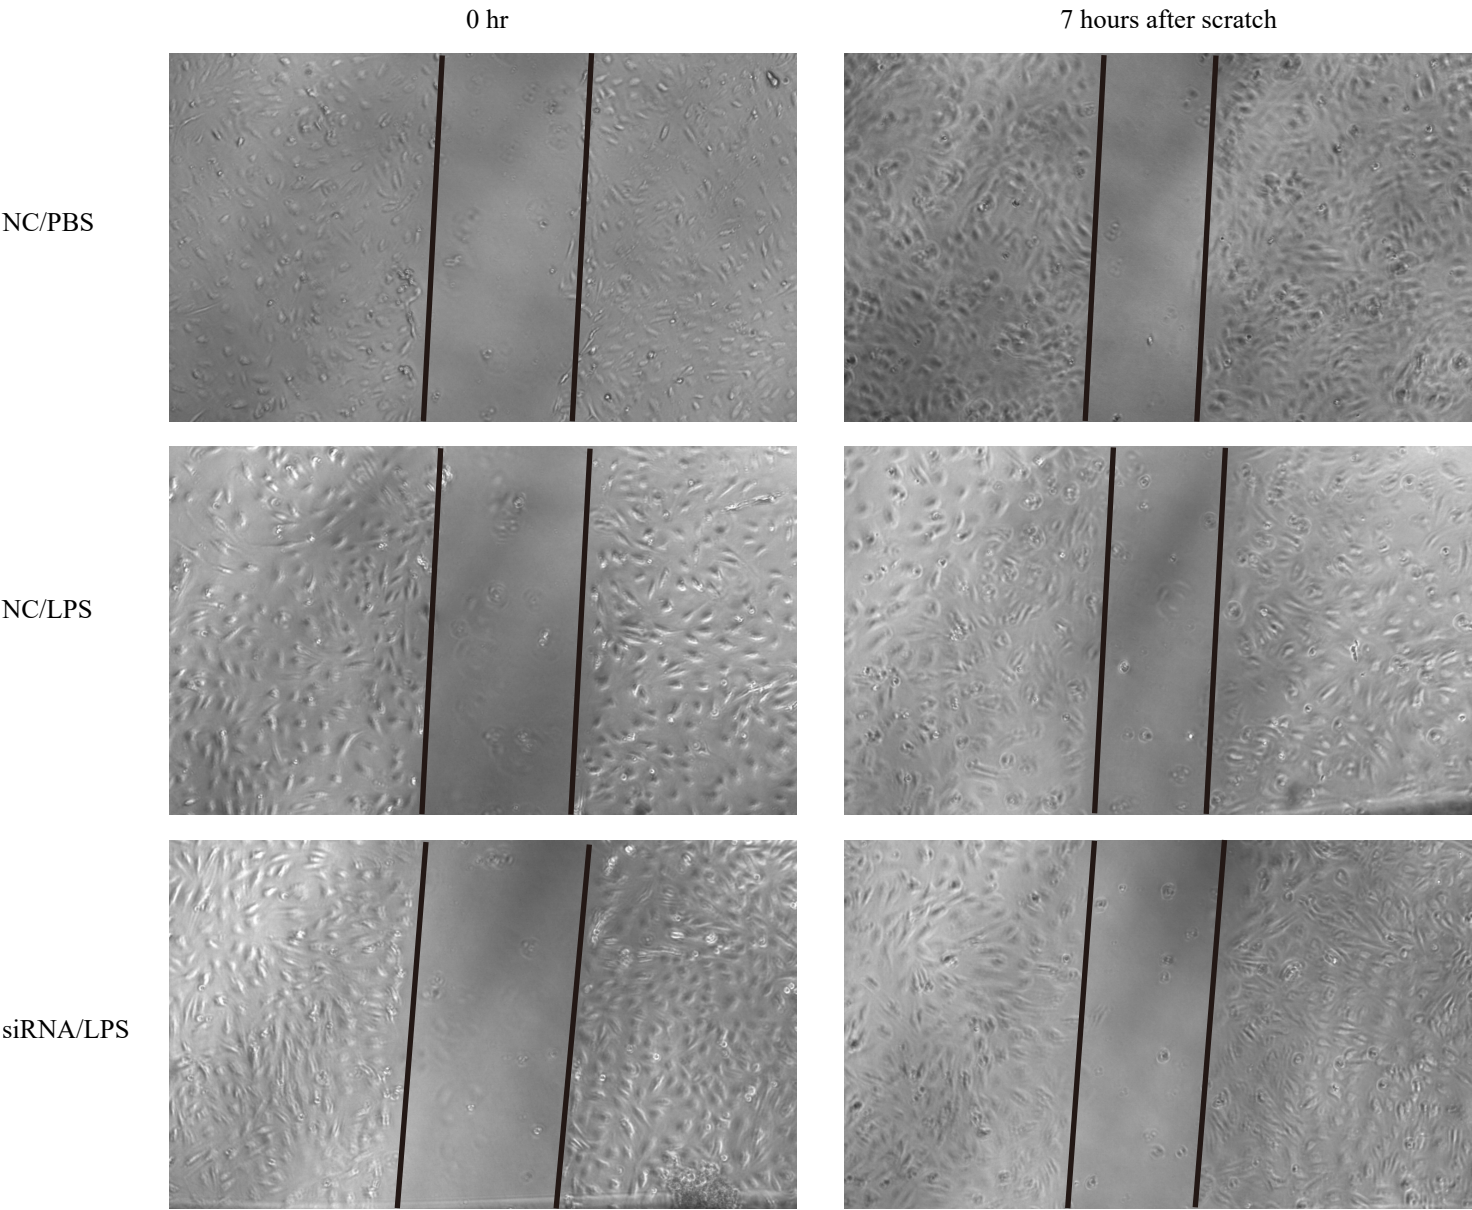

Supplement: s1 [file s1]
